# Supplementary material for: HDL-Associated Proteins in Subjects with Polycystic Ovary Syndrome: A Proteomic Study
Source: MDPI journal article supplement (doi:10.3390/cells12060855), 2023-03-09
Supplement: s1 [file s1]

**Supplementary table S1.** Levels of proteins involved in lipid metabolism in subjects with polycystic ovary syndrome (PCOS) fulfilling all three diagnostic criteria versus controls. Data presented as Mean ± 1 Standard Deviation of Relative Fluorescent Units (RFU).

|                          | PCOS             | Control          | p value  |
|--------------------------|------------------|------------------|----------|
| Alpha-1-antichymotrypsin | 248,880 (29,961) | 244,203 (35,228) | 0.27     |
| Alpha-1-antitrypsin      | 1114 (371)       | 1213 (699)       | 0.15     |
| Apolipoprotein A-I       | 14,631 (3465)    | 15,032 (2507)    | 0.33     |
| Apolipoprotein B         | 11,213 (5408)    | 10,077 (3582)    | 0.07     |
| Apolipoprotein D         | 3460 (693)       | 3371 (733)       | 0.34     |
| Apolipoprotein E         | 39,054 (17,973)  | 33,577 (13,945)  | 0.012    |
| Apolipoprotein E2        | 261,934 (50,357) | 259,099 (51,596) | 0.67     |
| Apolipoprotein E3        | 217,377 (67,477) | 201,576 (61,141) | 0.06     |
| Apolipoprotein E4        | 219,789 (58,305) | 210,604 (55,689) | 0.22     |
| Apolipoprotein L1        | 41,476 (11,107)  | 41,089 (10,343)  | 0.79     |
| Apolipoprotein M         | 7878 (3039)      | 9868 (3277)      | 0.000002 |
| Clusterin                | 887 (151)        | 897 (253)        | 0.69     |
| Complement C3            | 71,028 (25,536)  | 63,896 (26,822)  | 0.037    |
| Hemopexin                | 1229 (623)       | 1167 (597)       | 0.44     |
| Heparin cofactor II      | 4156 (773)       | 3821 (618)       | 0.0004   |
| Kininogen-1              | 27,717 (6477)    | 27,501 (6331)    | 0.80     |
| Serum amyloid A-1        | 1456 (2145)      | 1750 (4703)      | 0.51     |
| Amyloid beta A4          | 27,043 (19,245)  | 23,874 (15,735)  | 0.18     |
| Paraoxonase 1            | 151 (30)         | 146 (35)         | 0.24     |
